# Supplementary material for: B Cells and B Cell Blasts Withstand Cryopreservation While Retaining Their Functionality for Producing Antibody
Source: MDPI journal article supplement (doi:10.3390/cells7060050), 2018-05-31
Supplement: s1 [file s1]

# B Cells and B Cell Blasts Withstand Cryopreservation While Retaining Their Functionality for Producing Antibody

Philipp Fecher<sup>1,2</sup>, Richard Caspell<sup>1</sup>, Villian Naeem<sup>1</sup>, Alexey Y. Karulin<sup>1</sup>, Stefanie Kuerten<sup>2</sup> and Paul V. Lehmann<sup>1,\*</sup>

<sup>1</sup> Research & Development Department, Cellular Technology Limited, Shaker Heights, OH 44122, USA; philipp-fecher@t-online.de (P.F.); richard.caspell@immunospot.com (R.C.); villian.naeem@immunospot.com (V.N.); alexey.karulin@immunospot.com (A.K.); paul.lehmann@immunospot.com (P.V.L.)

<sup>2</sup> Institute of Anatomy and Cell Biology, Friedrich-Alexander University Erlangen-Nürnberg 91054 Erlangen, Germany; stefanie.kuerten@fau.de (S.K.)

\* Correspondence: paul.lehmann@immunospot.com; Tel.: +1-216-965-6311

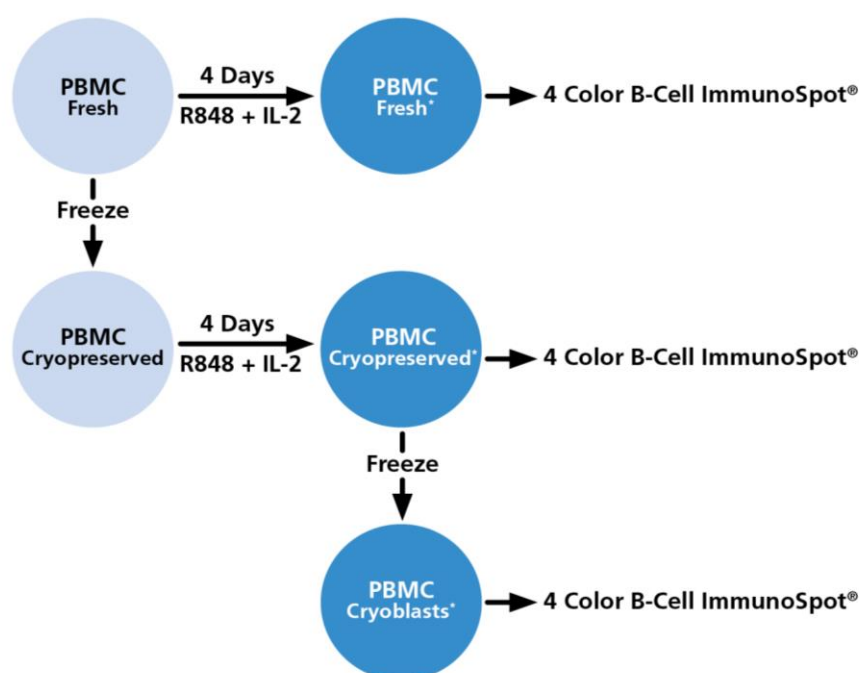

**Figure S1.** Comparing fresh and cryopreserved PBMC – specifying the treatment of the cells tested. Freshly isolated PBMC were polyclonally stimulated for 4 days and then seeded into a 4 color B cell ImmunoSpot® assay: “Fresh” PBMC. Upon receipt, a fraction of the fresh cells was cryopreserved, stored, thawed, and then polyclonally stimulated, now termed cryopreserved, or “Frozen” PBMC. A fraction of these “frozen” PBMC, containing B cell blasts, was re-frozen, stored, thawed and seeded without additional stimulation into ELISPOT assays as “Blasts”.

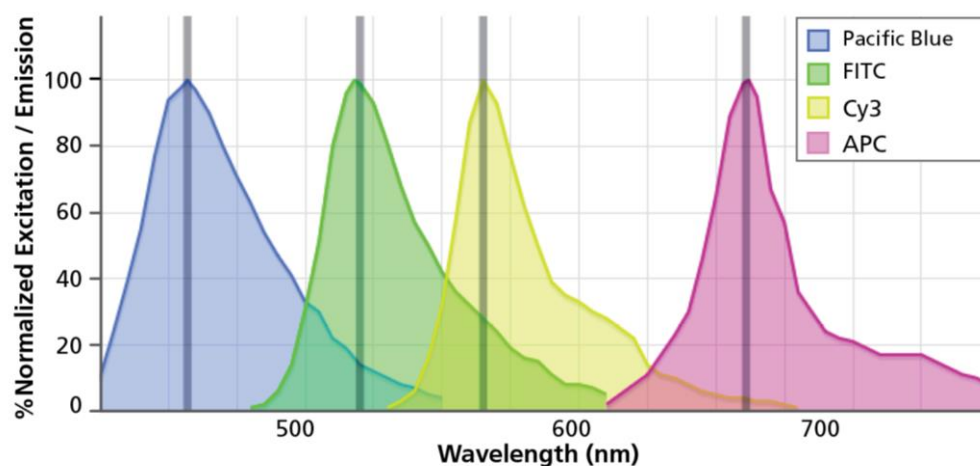

**Figure S2.** Partially overlapping spectra of standard organic fluorochromes. The figure shows the spectra for four standard organic fluorochromes, specified in the insert by color.

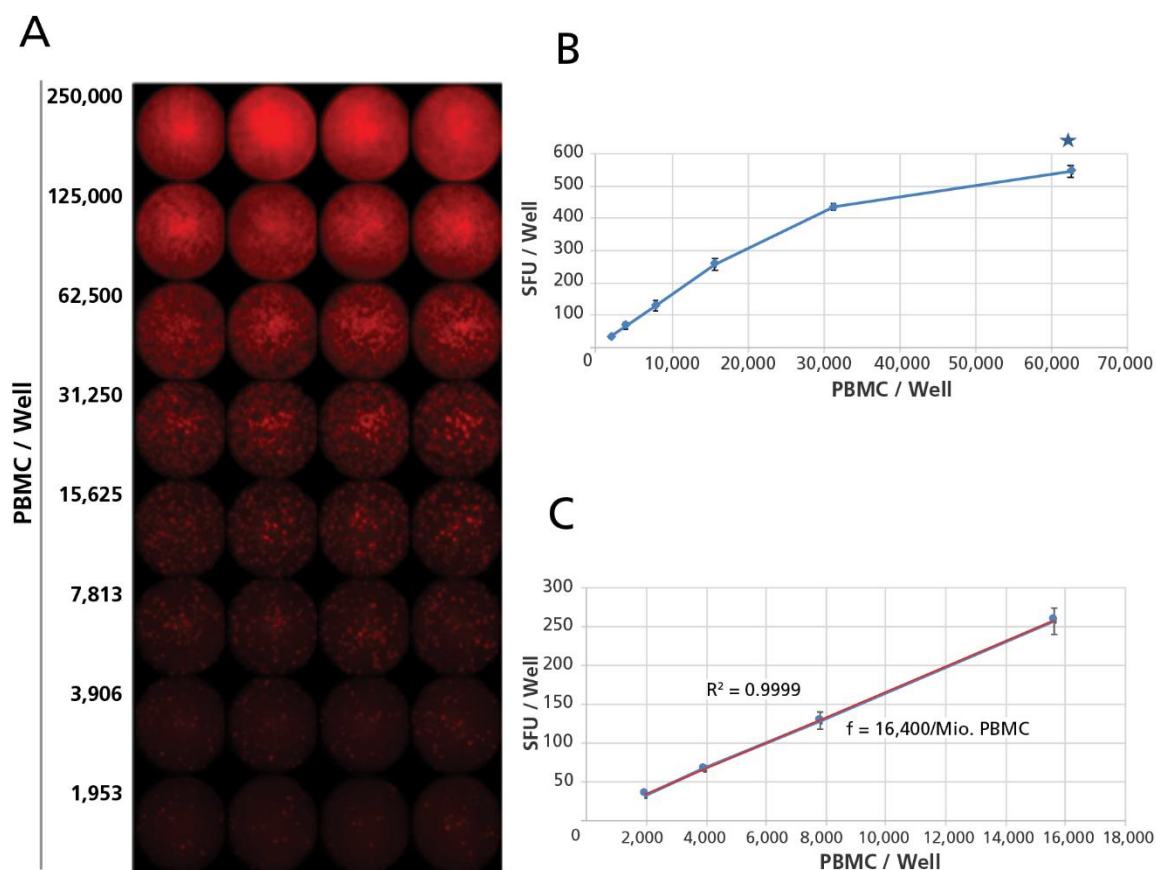

**Figure S3.** Calculating frequencies for IgM ASC in PBMC illustrated. The legend to Figure 4 applies, except here IgM was detected and analyzed.

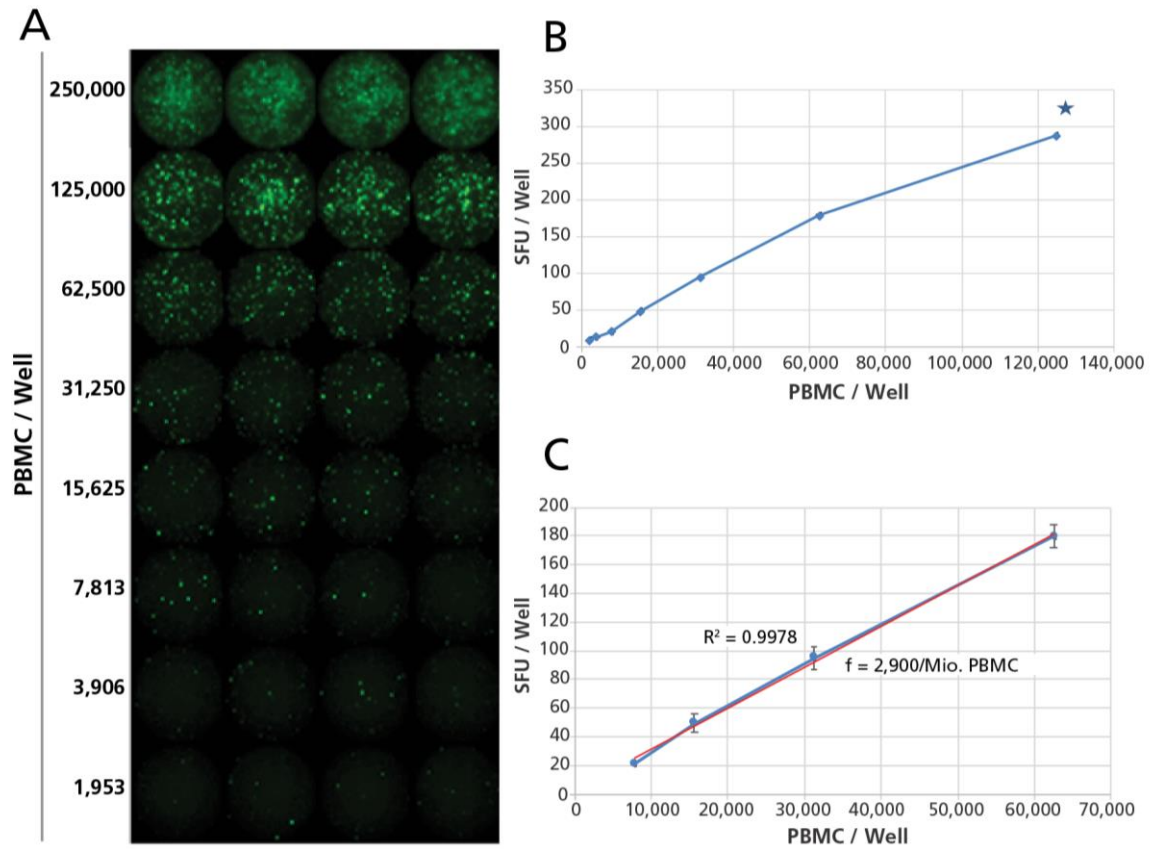

**Figure S4.** Calculating frequencies for IgA ASC in PBMC illustrated. The legend to Figure 4 applies, except here IgA was detected and analyzed.

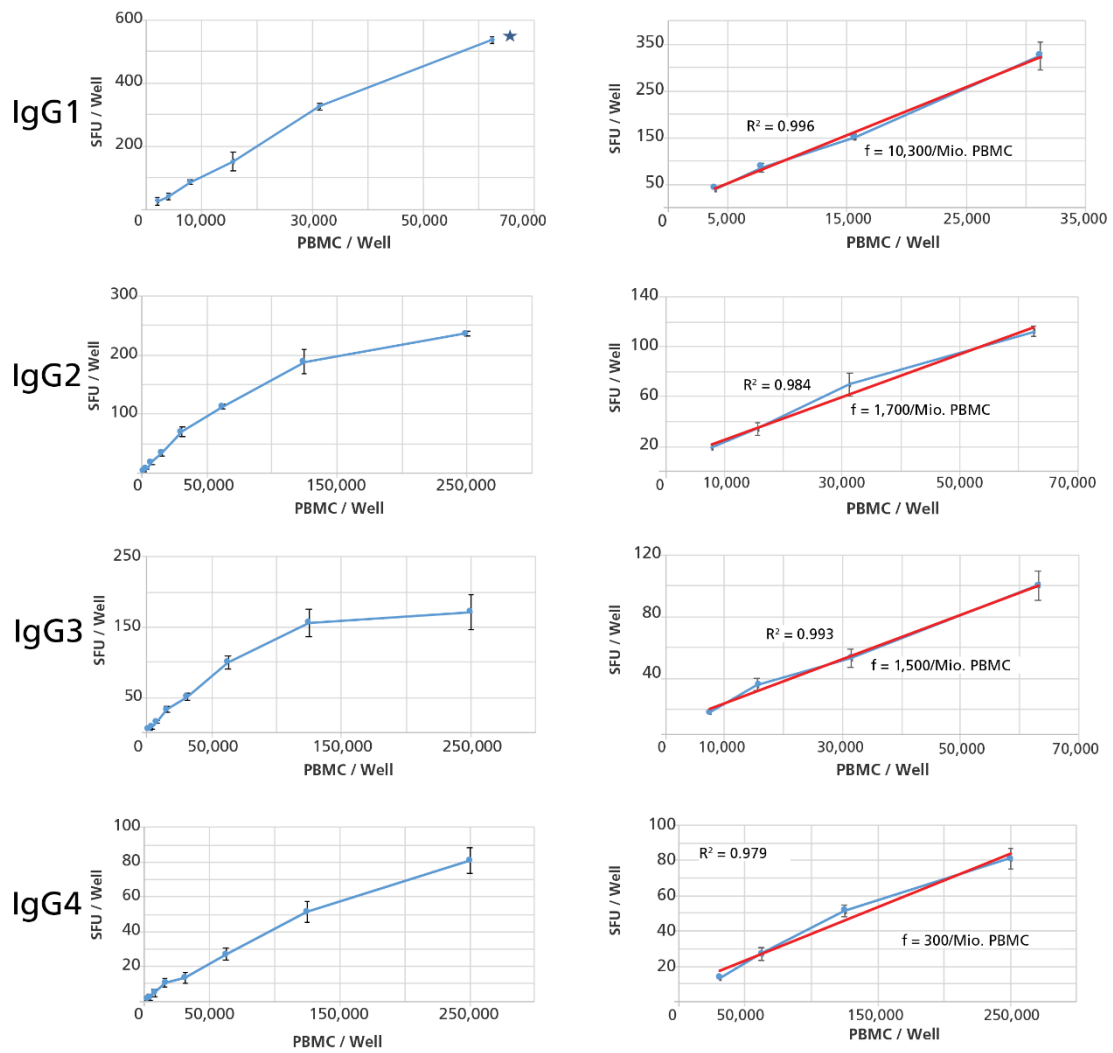

**Figure S5.** Calculating frequencies for ASC secreting IgG subclasses within PBMC. The legend to Figure 4 applies, except here the four IgG subclasses were detected using a corresponding four color IgG1/IgG2/IgG3/IgG4 ImmunoSpot® assay.
